# Supplementary material
Source: PubMed Central journal article supplement (PMC6921947)
Supplement: Supplemental_Material_1.pdf [file Supplemental_Material_1.pdf]

**Supplementary table 1: Genes associated with arterial aneurysm or dissection. Associated vascular phenotypes were found in the OMIM (online Mendelian Inheritance in Man) database.**

| <b>Gene symbol</b> | <b>Description</b>                                    | <b>Associated vascular phenotype</b>                                 | <b>OMIM No.</b> |
|--------------------|-------------------------------------------------------|----------------------------------------------------------------------|-----------------|
| ACTA2              | Actin, Alpha 2, Smooth Muscle, Aorta                  | Aortic aneurysm, familial thoracic 6                                 | 611788          |
| COL3A1             | Collagen Type III Alpha 1 Chain                       | Ehlers-Danlos syndrome, vascular type                                | 130050          |
| COL4A1             | Collagen Type IV Alpha 1 Chain                        | Hereditary Angiopathy with nephropathy, aneurysms, and muscle cramps | 611773          |
| COL4A3             | Collagen Type IV Alpha 3 Chain                        | Alport syndrome, autosomal recessive                                 | 203780          |
| COL4A4             | Collagen Type IV Alpha 4 Chain                        | Alport syndrome, autosomal recessive                                 | 203780          |
| COL4A5             | Collagen Type IV Alpha 5 Chain                        | Alport syndrome, X-linked                                            | 301050          |
| COL5A1             | Collagen Type V Alpha 1 Chain                         | Ehlers-Danlos syndrome, classic type, 1                              | 130000          |
| COL5A2             | Collagen Type V Alpha 2 Chain                         | Ehlers-Danlos syndrome, classic type, 2                              | 130010          |
| EFEMP2             | EGF Containing Fibulin Extracellular Matrix Protein 2 | Cutis laxa, autosomal recessive, type IB                             | 614437          |
| ELN                | Elastin                                               | Cutis laxa, autosomal dominant 1                                     | 123700          |
| FBN1               | Fibrillin 1                                           | Marfan syndrome                                                      | 154700          |
| FBLN5              | Fibulin 5                                             | Cutis laxa, autosomal recessive, type IA                             | 219100          |
| FLNA               | Filamin A                                             | Periventricular nodular heterotopia 1                                | 300049          |
| FOXE3              | Forkhead Box E3                                       | Aortic aneurysm, familial thoracic 11, susceptibility to             | 617349          |
| LOX                | Lysyl Oxidase                                         | Aortic aneurysm, familial thoracic 10                                | 617168          |
| MFAP5              | Microfibril Associated Protein 5                      | Aortic aneurysm, familial thoracic 9                                 | 616166          |
| MYH11              | Myosin Heavy Chain 11                                 | Aortic aneurysm, familial thoracic 4                                 | 132900          |
| MYLK               | Myosin Light Chain Kinase                             | Aortic aneurysm, familial thoracic 7                                 | 613780          |
| NOTCH1             | Notch 1                                               | Aortic valve disease 1                                               | 109730          |
| PLOD1              | Procollagen-Lysine,2-Oxoglutarate 5-Dioxygenase 1     | Ehlers-Danlos syndrome, kyphoscoliotic type, 1                       | 225400          |

|         |                                                   |                                                                  |        |
|---------|---------------------------------------------------|------------------------------------------------------------------|--------|
| PLOD3   | Procollagen-Lysine,2-Oxoglutarate 5-Dioxygenase 3 | Bone fragility with contractures, arterial rupture, and deafness | 612394 |
| PRKG1   | Protein Kinase CGMP-Dependent 1                   | Aortic aneurysm, familial thoracic 8                             | 615436 |
| SKI     | SKI Proto-Oncogene                                | Shprintzen-Goldberg syndrome                                     | 182212 |
| SLC2A10 | Solute Carrier Family 2 Member 10                 | Arterial tortuosity syndrome                                     | 208050 |
| SMAD3   | SMAD Family Member 3                              | Loeys-Dietz syndrome 3                                           | 613795 |
| SMAD4   | SMAD Family Member 4                              | Hereditary hemorrhagic telangiectasia syndrome                   | 175050 |
| TGFB2   | Transforming Growth Factor Beta 2                 | Loeys-Dietz syndrome 4                                           | 614816 |
| TGFB3   | Transforming Growth Factor Beta 3                 | Loeys-Dietz syndrome 5                                           | 615582 |
| TGFBR1  | Transforming Growth Factor Beta Receptor 1        | Loeys-Dietz syndrome 1                                           | 609192 |
| TGFBR2  | Transforming Growth Factor Beta Receptor 2        | Loeys-Dietz syndrome 2                                           | 610168 |
